# Supplementary material for: A sensitive pH indicator-based spectrophotometric assay for PHB depolymerase activity on microtiter plates
Source: Royal Society of Chemistry journal article supplement (doi:10.1039/d0ay00840k), 2020-01-01
Supplement: d0ay00840k1.pdf [file d0ay00840k1.pdf]

1 **APENDIX A. SUPPLEMENTARY DATA**

2

3 **A sensitive pH indicator-based spectrophotometric assay for PHB depolymerase activity on**  
4 **microtiter plates**

5 Maria Angeles Camacho-Ruiz <sup>a, b, 1</sup>, Marcelo Müller-Santos <sup>c, 1</sup>, Xitlalli D. Hernández-Mancillas <sup>a</sup>, Vicente  
6 P. Armenta-Perez <sup>a</sup>, Edgar Zamora-Gonzalez <sup>a, b</sup>, and Jorge A. Rodriguez <sup>a, \*</sup>

7

8 <sup>a</sup> Biotecnología Industrial, Centro de Investigación y Asistencia en Tecnología y Diseño del Estado de  
9 Jalisco (CIATEJ), Zapopan, 45019, Jalisco, Mexico.

10 <sup>b</sup> Laboratorio de Investigación en Biotecnología, Centro Universitario del Norte, Universidad de  
11 Guadalajara, Colotlan, 46200, Jalisco, Mexico.

12 <sup>c</sup> Departamento de Bioquímica e Biología Molecular, Universidade Federal do Paraná, Cx. P. 19046  
13 Centro Politécnico, Curitiba, Brazil.

14 <sup>1</sup> These authors contributed equally to this work.

15

16

17 \* Corresponding author:

18 Email address: [jrodriguez@ciatej.mx](mailto:jrodriguez@ciatej.mx) (J. A. Rodriguez)

19

20

## 21 Nomenclature

- 22  $U$  = units of enzyme activity  
23 for turbidimetric technique (PHBt) one U corresponds to 1  $\mu\text{g}$  of PHB hydrolyzed per minute,  
24 for PHB suspended with pH indicators (PHBs) one U corresponds to 1  $\mu\text{mol}$  of 3-hydroxybutyric acid  
25 released per minute,  
26 for PHB coated adding indicators (PHBc) one U corresponds to 1  $\mu\text{mol}$  of 3-hydroxybutyric acid released  
27 per minute.
- 28  $OD$  = optical density.
- 29  $\Delta OD/min_R$  = reaction signal determined by linear regression of time vs absorbance of the catalyzed reaction.
- 30  $\Delta OD/min_B$  = background signal determined by linear regression of time vs absorbance of the background signal.
- 31  $\Delta OD/min$  = reaction rate measured as the difference of reaction signal and background signal.
- 32  $s$  = slope value of standard curve of 3-hydroxybutyric acid ( $\text{mM}^{-1}$ ).
- 33  $DF$  = dilution factor.
- 34  $Z$  = Z-factor.
- 35  $\sigma_R$  = standard deviation of reaction signal.
- 36  $\sigma_B$  = standard deviation of the background signal.
- 37  $\mu_R$  = mean of reaction signal.
- 38  $\mu_B$  = mean of background signal.
- 39  $\lambda_{max}$  = maximum wavelength (nm).
- 40  $V_{max}$  = maximum velocity (OD/min).
- 41

42

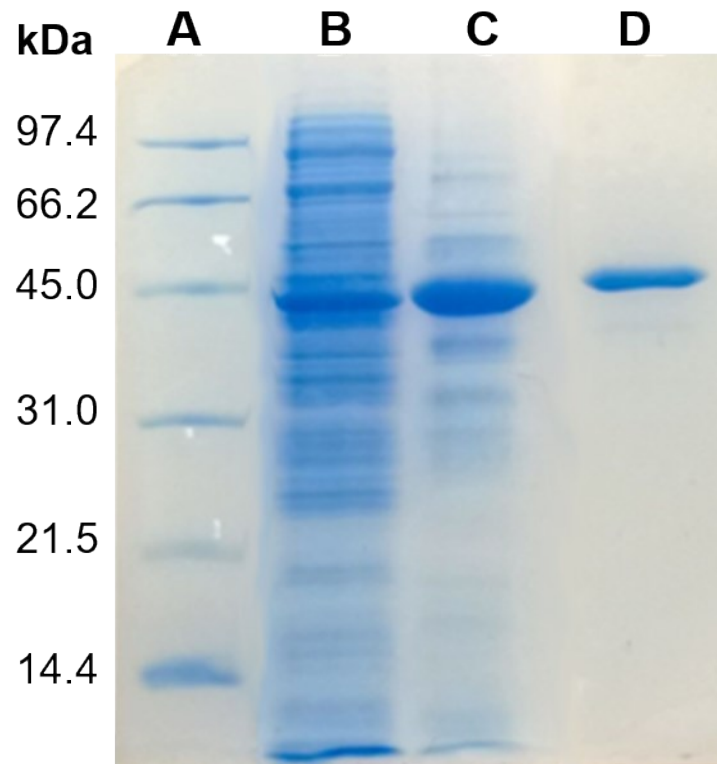

43

44

45 **Fig. S1.** rPI-PhaZ1 purity analysis by SDS-PAGE (12%). A. Molecular weight markers (Low range,  
46 BioRad). B. Lysate from *E. coli*. C. Concentrated pool from affinity HisTrap FF column (GE healthcare).  
47 D. Concentrated pool from gel filtration column (Superdex G-200 10/300 GL). The samples were  
48 prepared under reducing conditions and Coomassie brilliant blue was used to stain the proteins.

49

50

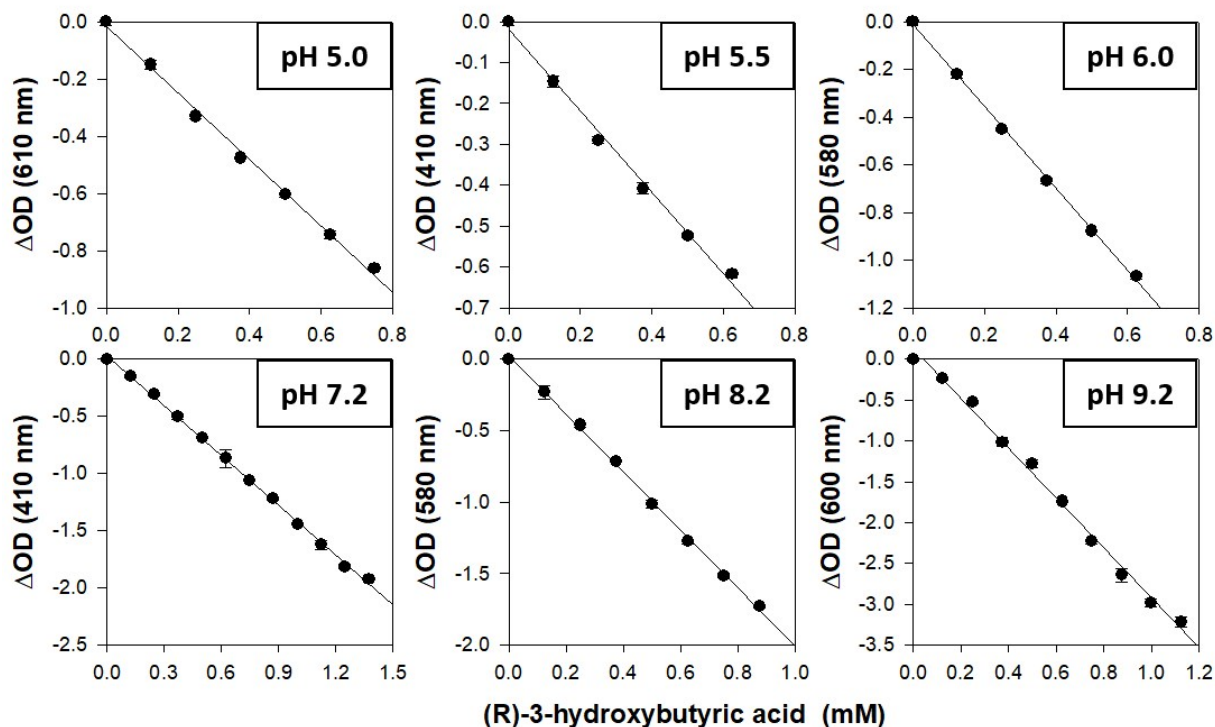

51

52 **Fig. S2.** Standard curves of hydroxybutyric acid (HBA) at different pH values. Assays were performed  
53 using different pH indicator-buffer pair for each one of pH values as described in Materials and Methods.  
54 Results are given as means  $\pm$  S.D. for three independent assays. Linear regressions with a  $R^2$  value of 0.99  
55 are shown.

56

57

58

59  
60

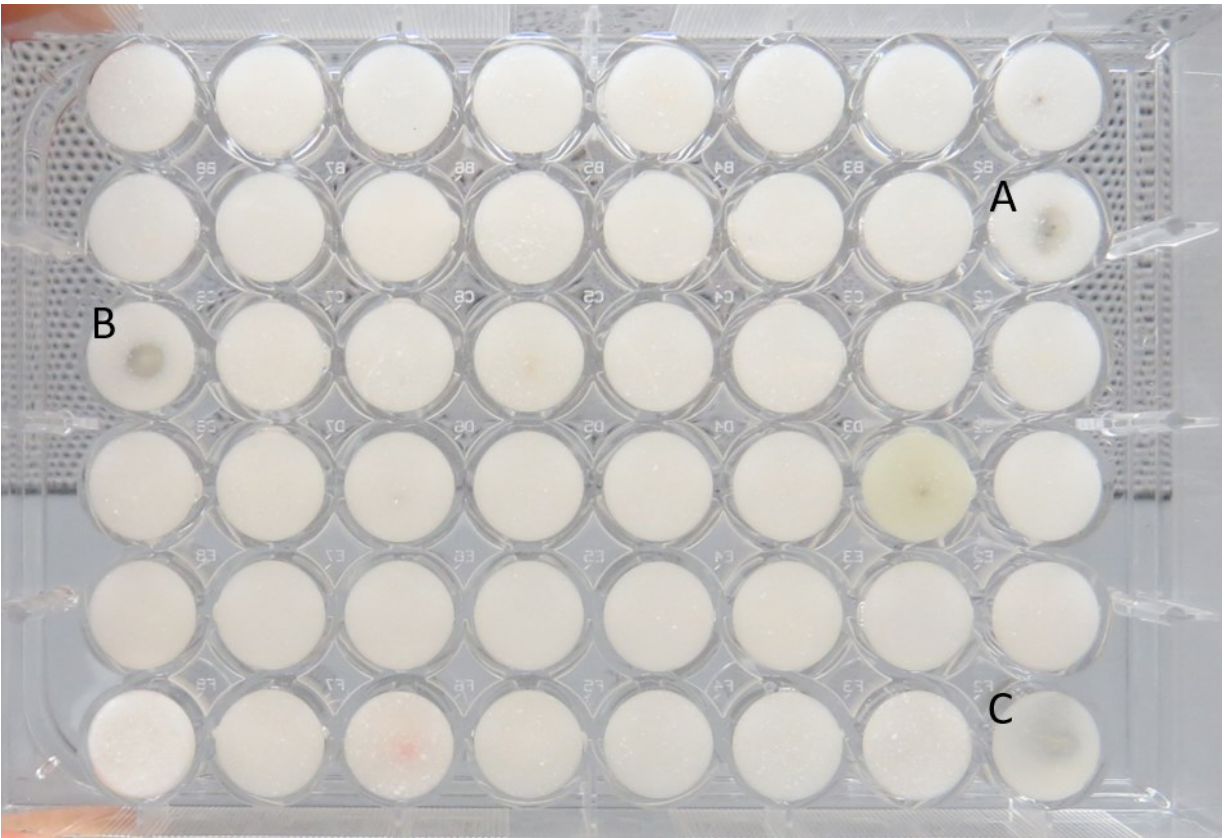

61

62

63 **Fig. S3.** Example of primary screening of PHB depolymerase strains producers. Assay was carried out  
64 using agar cultures with PHB as the sole carbon source. A halo of hydrolysis was observed in strains  
65 ACTXRF-5 (A), ACSJRF-3 (B) and AC3-5 (C). The photography was taken of the bottom of the plate.

66

67

68 **Table S1.** Repeatability of techniques.

| <b>Technique</b> | <b>N</b> | <b>Mean<br/>(U/mg)</b> | <b>Standard deviation</b> | <b>Confidence Interval*<br/>(95%)</b> | <b>Total error<br/>(%)</b> |
|------------------|----------|------------------------|---------------------------|---------------------------------------|----------------------------|
| PHBt             | 15       | 7433                   | 883                       | (6945, 7922)                          | ±6.6                       |
| PHBc             | 15       | 10.40                  | 1.26                      | (9.71, 11.10)                         | ±6.7                       |
| PHBs             | 15       | 29.12                  | 3.2                       | (27.33, 30.89)                        | ±6.1                       |

69 \*t-distribution was used to construct confidence intervals ( $\alpha=0.05$ ).

70 The enzymatic activity of a series of enzyme dilutions corresponding to the linear range was measured. Each test  
71 was performed in triplicate under repeatability conditions. All efforts were made to keep conditions constant by  
72 using the same instrument and operator, and repeating the measurements during a short time period. The assays  
73 were performed with 50  $\mu\text{g}$  of PHB per microwell at 37°C and pH 7.2. The enzymatic activity was expressed in  
74 U/mg.

75

76

77 **Table S2.** One-way ANOVA for reproducibility of PHBc technique. Effect of human-  
78 associated random error.

| <b>Analyst</b> | <b>N</b> | <b>Mean<br/>(U/mg)</b> | <b>Standard deviation</b> | <b>Confidence Interval<br/>(95%)</b> | <b>Total error<br/>(%)</b> | <b>p-value*</b> |
|----------------|----------|------------------------|---------------------------|--------------------------------------|----------------------------|-----------------|
| <b>A</b>       | 9        | 9.51                   | 1.01                      | (8.65, 10.37)                        | ±9.05                      | 0.363           |
| <b>B</b>       | 9        | 8.97                   | 1.40                      | (8.11, 9.84)                         | ±9.59                      |                 |

79 \*p-value was determined by One-way ANOVA with 95% of confidence.

80 Each test was performed under repeatability conditions. The assays were performed with 0.5 µg of rPI-PhaZ1 and 50 µg  
81 of PHB per microwell at 37°C and pH 7.2. The enzymatic activity was expressed in U/mg.

82

83
